# Supplementary material for: Architecture and self-assembly of the jumbo bacteriophage nuclear shell
Source: Springer Nature journal article supplement (doi:10.1038/s41586-022-05013-4), 2022-08-03
Supplement: 41586_2022_5013_MOESM1_ESM.pdf [file 41586_2022_5013_MOESM1_ESM.pdf]

**Supplementary information**

---

**Architecture and self-assembly of the jumbo bacteriophage nuclear shell**

---

In the format provided by the authors and unedited

**Supplementary Figure 1. Alignment of 201phi2-1 and phiKZ chimallin proteins.** Alignment of 201phi2-1 gp105 and phiKZ gp54 protein sequences. Secondary structure and domain annotation are shown above the alignment and are based on the 201phi2-1 structure. Dashed lines in the domain annotation indicate unresolved segments. The phiKZ prohead protease (gp175) cleavage-site in gp54 is indicated by a yellow arrow. Cleavage-site based on that identified by Weintraub *et al.*<sup>20</sup>.

**SI Table 1. *In situ* cryoFIB-ET data collection and reconstruction statistics.**

**SI Table 2. Cryo-EM data collection, reconstruction, and refinement statistics.** Particle counts for C4 and C1 refinements are for the total number of sub-particles.

**SI Table 3. Summary of *in vitro* 201phi2-1 chimallin protomer interfaces.** Chain ‘A’ corresponds to the position of the focal yellow colored chain and all other chains match the color scheme in **Extended Data Figure 5**.

**SI Table 4. Summary of a 201phi2-1 chimallin protomer’s polar interactions *in vitro*.** Chain ‘A’ corresponds to the position of the focal yellow colored chain and all other chains match the color scheme in **Extended Data Figure 5**.

**SI Table 5. Gaussian network model hinge residues for 201phi2-1 chimallin.**

**SI Table 6. Pore-facing residues during 201phi2-1 chimallin simulations.** Pore-facing residues are defined as residues exposing their amino acid side chains to the channel pore more than 50% over the course of the averaged 300-ns simulations.

**SI Table 7. Bacteriophage chimallin proteins.** Asterisks (\*) denote sequences included in the phylogenetic tree in **Figure 5a**.

**SI Table 8. Summary of *in vitro* Goslar chimallin protomer interfaces.** Chain ‘A’ corresponds to the position of the focal yellow colored chain and all other chains match the color scheme in **Extended Data Figure 5**.

**SI Table 9. Summary of a Goslar chimallin protomer’s polar interactions *in vitro*.** Chain ‘A’ corresponds to the position of the focal yellow colored chain and all other chains match the color scheme in **Extended Data Figure 5**.

**SI Table 10. Bacterial strains and plasmids used in this study.**

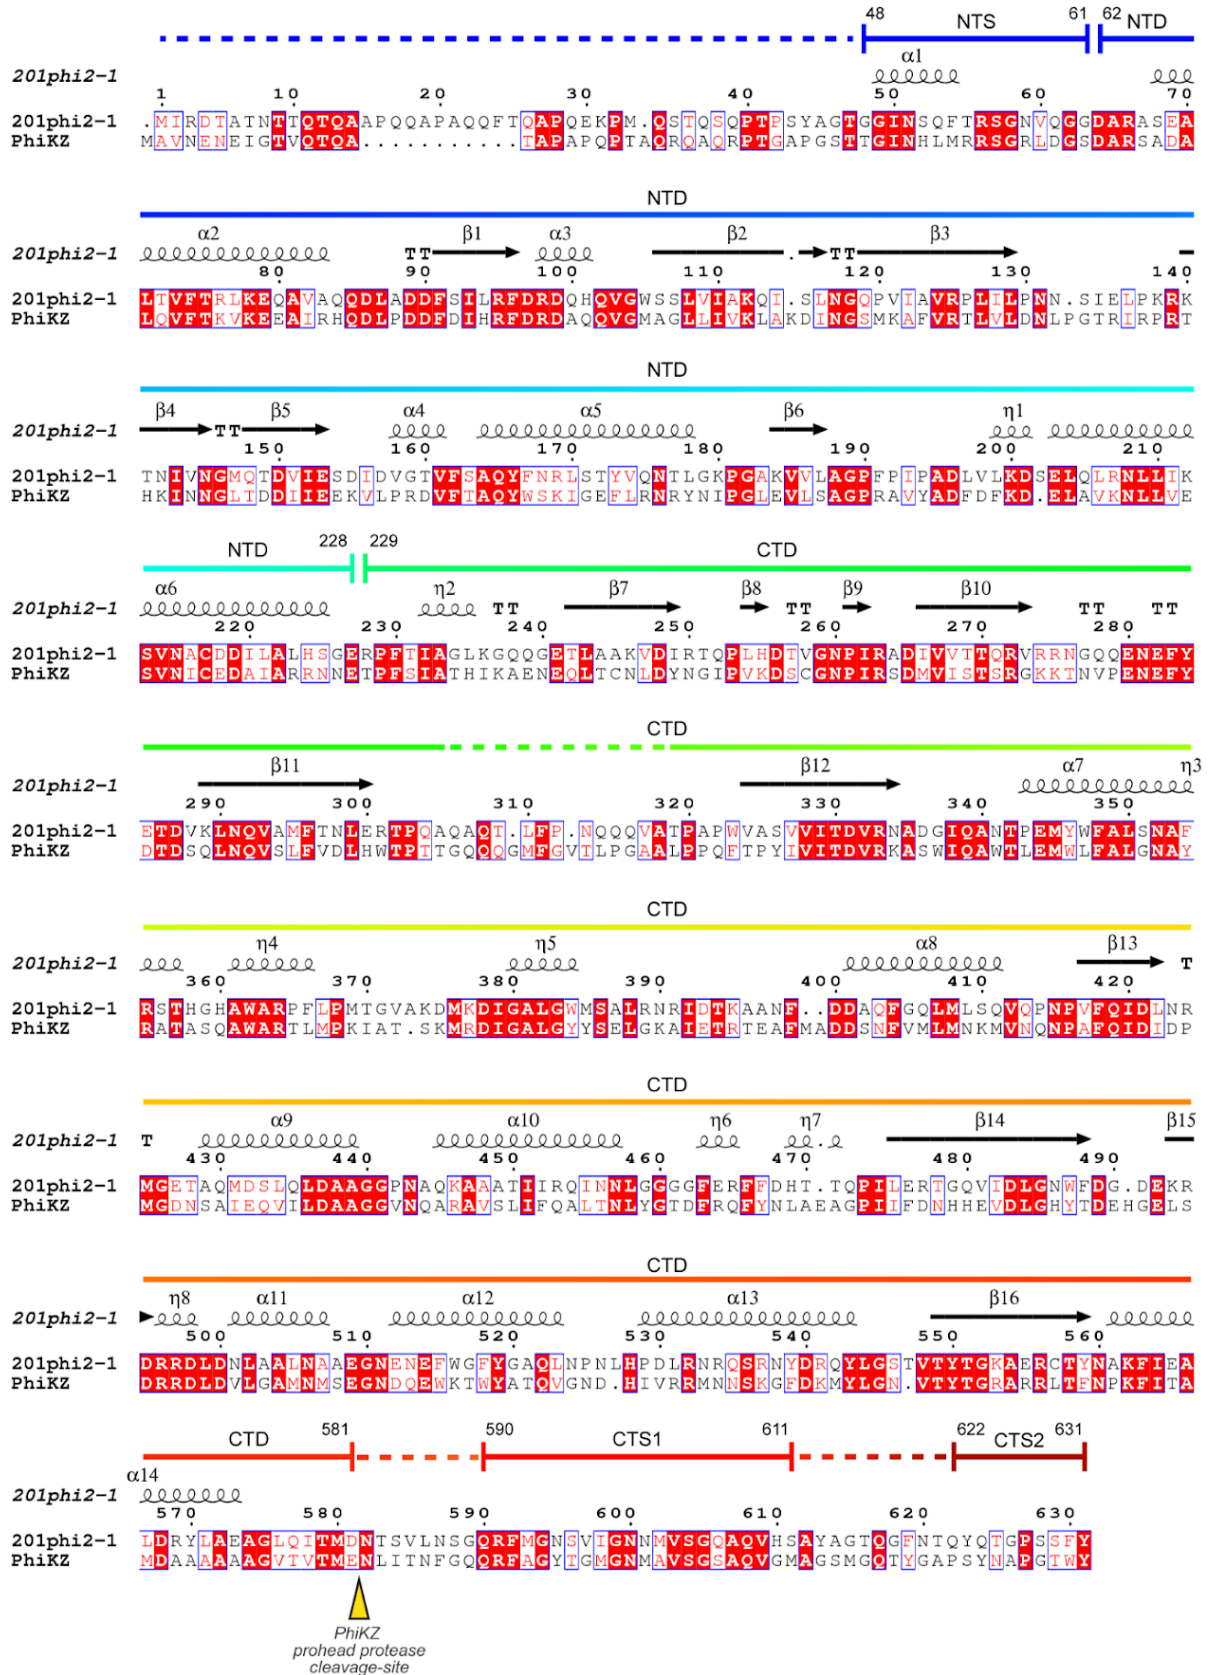

Supplementary Figure 1. Alignment of 201phi2-1 and phiKZ chimallin proteins.

**SI Table 1 | *In situ* cryoFIB-ET data collection and reconstruction statistics**

|                                                    | 201phi2-1 infected <i>P. chlororaphis</i> |                              |                            |                         |                            | Goslar infected <i>E. coli</i> (APEC2248) |                        |                              |                            |                           |
|----------------------------------------------------|-------------------------------------------|------------------------------|----------------------------|-------------------------|----------------------------|-------------------------------------------|------------------------|------------------------------|----------------------------|---------------------------|
|                                                    | chimallin                                 |                              |                            |                         |                            | chimallin                                 |                        |                              |                            |                           |
|                                                    | 70S<br>(EMD-<br>25183)                    | Consensus<br>(EMD-<br>25221) | Concave<br>(EMD-<br>25220) | Flat<br>(EMD-<br>25222) | Convex<br>(EMD-<br>25223)  | 50S<br>(EMD-<br>25360)                    | 70S<br>(EMD-<br>25359) | Consensus<br>(EMD-<br>25229) | Concave<br>(EMD-<br>25262) | Convex<br>(EMD-<br>25358) |
| <b>Data collection</b>                             |                                           |                              |                            |                         |                            |                                           |                        |                              |                            |                           |
| Magnification                                      |                                           |                              | 33,000                     |                         |                            |                                           |                        | 42,000                       |                            |                           |
| Voltage (kV)                                       |                                           |                              |                            |                         | 300                        |                                           |                        |                              |                            |                           |
| Defocus range<br>( $\mu\text{m}$ )                 |                                           |                              | -4.5 to -6                 |                         |                            |                                           |                        | -5 to -6                     |                            |                           |
| Pixel size ( $\text{\AA}$ )                        |                                           |                              | 3.46                       |                         |                            |                                           |                        | 4.27                         |                            |                           |
| Electron exposure<br>( $\text{e}^-/\text{\AA}^2$ ) |                                           |                              | 120                        |                         |                            |                                           |                        | 150                          |                            |                           |
| Tilt-range/step ( $^\circ$ )                       |                                           |                              | $\pm 51 / 3$               |                         |                            |                                           |                        | $\pm 56 / 2$                 |                            |                           |
| Tilt-scheme                                        |                                           |                              |                            |                         | dose-symmetric, grouping 2 |                                           |                        |                              |                            |                           |
| <b>Processing</b>                                  |                                           |                              |                            |                         |                            |                                           |                        |                              |                            |                           |
| Symmetry imposed                                   | C1                                        | C4                           | C4                         | C4                      | C4                         | C1                                        | C1                     | C4                           | C4                         | C4                        |
| Initial particle<br>images (no.)                   | 17,169                                    | 66,887                       |                            | 8,454                   |                            | 98,981                                    |                        | 42,416                       |                            | 4,501                     |
| Final particle<br>images (no.)                     | 11,148                                    | 8,454                        | 2,033                      | 4,475                   | 945                        | 3,710                                     | 46,056                 | 4,501                        | 2,802                      | 1,699                     |
| Map resolution ( $\text{\AA}$ )                    | 10                                        | 24                           | 20                         | 18                      | 23                         | 12                                        | 8.5                    | 27                           | 20                         | 25                        |
| FSC threshold                                      |                                           |                              |                            |                         |                            | 0.143                                     |                        |                              |                            |                           |

**SI Table 2 | Cryo-EM data collection, reconstruction, and refinement statistics**

|                                        | 201phi2-1<br>gp105                 |                                       |                                      | Goslar<br>gp189                    |                                       |                                      |
|----------------------------------------|------------------------------------|---------------------------------------|--------------------------------------|------------------------------------|---------------------------------------|--------------------------------------|
|                                        | 24mer<br>(EMD-25390)<br>(PDB 7SQQ) | tetramer<br>(EMD-25391)<br>(PDB 7SQR) | monomer<br>(EMD-25392)<br>(PDB 7SQS) | 24mer<br>(EMD-25394)<br>(PDB 7SQT) | tetramer<br>(EMD-25395)<br>(PDB 7SQU) | monomer<br>(EMD-25396)<br>(PDB 7SQV) |
| <b>Data collection and processing</b>  |                                    |                                       |                                      |                                    |                                       |                                      |
| Magnification                          |                                    | 130,000                               |                                      |                                    | 165,000                               |                                      |
| Voltage (kV)                           |                                    |                                       |                                      | 300                                |                                       |                                      |
| Electron exposure (e-/Å <sup>2</sup> ) |                                    | 43                                    |                                      |                                    | 40                                    |                                      |
| Defocus range (µm)                     |                                    |                                       |                                      | -0.1 to -1.5                       |                                       |                                      |
| Pixel size (Å)                         |                                    | 1.075                                 |                                      |                                    | 0.8452                                |                                      |
| Symmetry imposed                       | O                                  | C4                                    | C1                                   | O                                  | C4                                    | C1                                   |
| Initial particle images (no.)          | 140,782                            | 772,788                               | 2,657,452                            | 289,387                            | 471,192                               | 1,407,340                            |
| Final particle images (no.)            | 128,798                            | 664,363                               | 2,657,452                            | 78,532                             | 351,835                               | 1,407,340                            |
| Map resolution (Å)                     | 4.2                                | 3.4                                   | 3.1                                  | 4.0                                | 2.6                                   | 2.3                                  |
| FSC threshold                          |                                    |                                       |                                      | 0.143                              |                                       |                                      |
| Map resolution range (Å)               | 4.0 to 5.1                         | 3.3 to 4.4                            | 2.9 to 4.8                           | 3.7 to 6.0                         | 2.5 to 3.4                            | 2.3 to 3.4                           |
| <b>Refinement</b>                      |                                    |                                       |                                      |                                    |                                       |                                      |
| Initial model used (PDB code)          |                                    | <i>de novo</i>                        |                                      |                                    | 7SQS                                  |                                      |
| Model resolution (Å)                   | 4.7                                | 3.6                                   | 3.3                                  | 4.4                                | 2.8                                   | 2.5                                  |
| FSC threshold                          |                                    |                                       |                                      | 0.5                                |                                       |                                      |
| Model composition                      |                                    |                                       |                                      |                                    |                                       |                                      |
| Non-hydrogen atoms                     | 103,632                            | 17,272                                | 4,376                                | 107,136                            | 17,856                                | 4,471                                |
| Protein residues                       | 13,296                             | 2,216                                 | 560                                  | 13,752                             | 2,292                                 | 573                                  |
| Ligands                                | 0                                  | 0                                     | 0                                    | 0                                  | 0                                     | 7                                    |
| <i>B</i> factors (Å <sup>2</sup> )     |                                    |                                       |                                      |                                    |                                       |                                      |
| Protein                                | 408.17                             | 125.69                                | 108.00                               | 318.81                             | 97.77                                 | 77.87                                |
| Ligand (waters)                        | n.a.                               | n.a.                                  | n.a.                                 | n.a.                               | n.a.                                  | 71.61                                |
| R.m.s. deviations                      |                                    |                                       |                                      |                                    |                                       |                                      |
| Bond lengths (Å)                       | 0.003                              | 0.003                                 | 0.002                                | 0.010                              | 0.010                                 | 0.001                                |
| Bond angles (°)                        | 0.633                              | 0.632                                 | 0.469                                | 0.699                              | 0.698                                 | 0.380                                |

---

|                   |       |       |       |       |       |       |
|-------------------|-------|-------|-------|-------|-------|-------|
| Validation        |       |       |       |       |       |       |
| MolProbity score  | 1.63  | 1.56  | 1.31  | 1.16  | 0.94  | 0.87  |
| Clashscore        | 8.23  | 6.82  | 3.59  | 2.13  | 1.16  | 1.36  |
| Poor rotamers (%) | 0     | 0     | 0.22  | 1.25  | 1.04  | 0.63  |
| Ramachandran plot |       |       |       |       |       |       |
| Favored (%)       | 96.89 | 96.89 | 97.08 | 97.53 | 97.53 | 99.29 |
| Allowed (%)       | 3.11  | 3.11  | 2.92  | 2.47  | 2.47  | 0.71  |
| Disallowed (%)    | 0     | 0     | 0     | 0     | 0     | 0     |

---

**SI Table 3 | Summary of *in vitro* 201phi2-1 chimallin protomer interfaces**

| <b>Chain-1</b> | <b>Atoms</b> | <b>Residues</b> | <b>Chain-2</b> | <b>Atoms</b> | <b>Residues</b> | <b>Area (Å<sup>2</sup>)</b> | <b>H bonds</b> | <b>Salt bridge</b> | <b>Cation-<math>\pi</math></b> |
|----------------|--------------|-----------------|----------------|--------------|-----------------|-----------------------------|----------------|--------------------|--------------------------------|
| A              | 28           | 9               | F              | 28           | 9               | 307                         | 0              | 0                  | 0                              |
| A              | 130          | 34              | H              | 147          | 43              | 1253                        | 7              | 6                  | 0                              |
| A              | 147          | 43              | B              | 130          | 34              | 1253                        | 7              | 6                  | 0                              |
| A              | 198          | 53              | D              | 205          | 56              | 1945                        | 14             | 0                  | 1                              |
| A              | 205          | 56              | G              | 198          | 53              | 1945                        | 14             | 0                  | 1                              |

**SI Table 4 | Summary of a 201phi2-1 chimallin protomer's polar interactions *in vitro***

| Chain-1 | Resi | Resn | Atom    | Chain-2 | Resi | Resn | Atom    | Dist (Å) | Type        |
|---------|------|------|---------|---------|------|------|---------|----------|-------------|
| A       | B    | 48   | GLY N   | H       | A    | 287  | ASP OD2 | 3.6      | H bond      |
| A       | B    | 51   | ASN NE2 | H       | A    | 337  | GLY O   | 3.2      | H bond      |
| A       | B    | 51   | ASN OD1 | H       | A    | 339  | GLN N   | 3.4      | H bond      |
| A       | B    | 56   | ARG O   | H       | A    | 339  | GLN NE2 | 2.6      | H bond      |
| A       | B    | 59   | ASN N   | H       | A    | 86   | ASP O   | 3.5      | H bond      |
| A       | B    | 102  | GLN OE1 | H       | A    | 281  | ASN ND2 | 2.3      | H bond      |
| A       | B    | 163  | SER OG  | H       | A    | 282  | GLU OE2 | 3.1      | H bond      |
| A       | B    | 56   | ARG NE  | H       | A    | 219  | ASP OD1 | 2.5      | Salt bridge |
| A       | B    | 56   | ARG NH1 | H       | A    | 227  | GLU OE1 | 3.4      | Salt bridge |
| A       | B    | 56   | ARG NH1 | H       | A    | 227  | GLU OE2 | 3.7      | Salt bridge |
| A       | B    | 56   | ARG NH2 | H       | A    | 227  | GLU OE1 | 3.9      | Salt bridge |
| A       | B    | 56   | ARG NH2 | H       | A    | 227  | GLU OE2 | 2.9      | Salt bridge |
| A       | B    | 56   | ARG NH2 | H       | A    | 219  | ASP OD1 | 3.3      | Salt bridge |
| A       | G    | 319  | THR OG1 | D       | A    | 319  | THR N   | 2.9      | H bond      |
| A       | G    | 406  | GLN OE1 | D       | A    | 306  | GLN N   | 3.9      | H bond      |
| A       | G    | 424  | ARG NH2 | D       | A    | 624  | GLN O   | 3.3      | H bond      |
| A       | G    | 430  | GLN OE1 | D       | A    | 629  | SER N   | 3.8      | H bond      |
| A       | G    | 430  | GLN OE1 | D       | A    | 629  | SER OG  | 2.8      | H bond      |
| A       | G    | 437  | ASP OD2 | D       | A    | 631  | TYR OH  | 2.8      | H bond      |
| A       | G    | 592  | PHE O   | D       | A    | 516  | TRP NE1 | 2.3      | H bond      |
| A       | G    | 595  | ASN N   | D       | A    | 301  | ARG O   | 3.5      | H bond      |
| A       | G    | 604  | SER N   | D       | A    | 565  | GLU OE2 | 3        | H bond      |
| A       | G    | 604  | SER OG  | D       | A    | 565  | GLU OE2 | 3.4      | H bond      |
| A       | G    | 605  | GLY N   | D       | A    | 565  | GLU OE2 | 3.6      | H bond      |
| A       | G    | 606  | GLN NE2 | D       | A    | 358  | HIS O   | 3.1      | H bond      |
| A       | G    | 607  | ALA N   | D       | A    | 357  | THR OG1 | 3.8      | H bond      |



|   |   |     |     |    |   |   |     |     |   |     |               |
|---|---|-----|-----|----|---|---|-----|-----|---|-----|---------------|
| A | G | 610 | HIS | N  | D | A | 578 | ILE | O | 3.1 | H bond        |
| A | G | 446 | LYS | NZ | D | A | 631 | TYR | - | 5.8 | Cation- $\pi$ |

**SI Table 5 | Gaussian network model hinge residues for 201phi2-1 chimallin**

| <b>resi</b> | <b>resn</b> | <b>Mode 1</b> | <b>Mode 2</b> | <b>Mode 3</b> | <b>Mode 4</b> | <b>Mode 5</b> | <b>total</b> |
|-------------|-------------|---------------|---------------|---------------|---------------|---------------|--------------|
| 45          | ALA         | 1             | 2             | 2             | 4             | 4             | 13           |
| 46          | GLY         | 5             | 5             | 4             | -             | -             | 14           |
| 47          | THR         | -             | 1             | 1             | -             | 2             | 4            |
| 50          | ILE         | -             | -             | 1             | -             | -             | 1            |
| 51          | ASN         | 1             | -             | -             | -             | -             | 1            |
| 60          | VAL         | -             | -             | 1             | -             | -             | 1            |
| 62          | GLY         | 2             | 3             | 2             | -             | -             | 7            |
| 63          | GLY         | 4             | 3             | 3             | -             | -             | 10           |
| 64          | ASP         | -             | -             | 1             | -             | -             | 1            |
| 66          | ARG         | -             | -             | 1             | -             | -             | 1            |
| 97          | ASP         | -             | -             | 1             | -             | -             | 1            |
| 106         | SER         | -             | -             | 1             | -             | -             | 1            |
| 132         | ASN         | -             | -             | 1             | -             | -             | 1            |
| 138         | LYS         | -             | -             | 1             | -             | -             | 1            |
| 161         | VAL         | -             | -             | 1             | -             | -             | 1            |
| 163         | SER         | -             | -             | 1             | -             | -             | 1            |
| 166         | TYR         | -             | -             | 1             | -             | -             | 1            |
| 239         | GLN         | -             | -             | 1             | -             | -             | 1            |
| 241         | GLU         | -             | -             | 1             | -             | -             | 1            |
| 242         | THR         | -             | -             | 1             | -             | -             | 1            |
| 243         | LEU         | -             | -             | 1             | -             | -             | 1            |
| 244         | ALA         | -             | -             | 1             | -             | -             | 1            |
| 271         | GLN         | -             | -             | 1             | -             | -             | 1            |
| 276         | ASN         | 1             | 1             | 1             | -             | -             | 3            |
| 277         | GLY         | 3             | 2             | 2             | -             | -             | 7            |
| 278         | GLN         | 1             | 2             | 1             | -             | -             | 4            |
| 279         | GLN         | 1             | 1             | 1             | -             | -             | 3            |
| 280         | GLU         | -             | -             | 1             | -             | -             | 1            |
| 284         | TYR         | -             | 1             | 1             | -             | -             | 2            |
| 285         | GLU         | 3             | 2             | 2             | -             | -             | 7            |
| 286         | THR         | 3             | 3             | 3             | -             | -             | 9            |
| 289         | LYS         | -             | -             | 1             | -             | -             | 1            |
| 336         | ASP         | -             | -             | 1             | -             | -             | 1            |
| 337         | GLY         | -             | -             | 1             | -             | -             | 1            |
| 358         | HIS         | -             | -             | 1             | -             | -             | 1            |
| 368         | PRO         | -             | -             | 1             | -             | -             | 1            |
| 370         | THR         | 2             | 1             | 2             | -             | -             | 5            |
| 371         | GLY         | 1             | 1             | -             | -             | -             | 2            |
| 372         | VAL         | 3             | 2             | 2             | -             | -             | 7            |
| 373         | ALA         | -             | 1             | 1             | -             | -             | 2            |
| 375         | ASP         | -             | -             | 1             | -             | -             | 1            |
| 396         | ALA         | -             | -             | 1             | -             | -             | 1            |
| 397         | ALA         | -             | -             | 1             | -             | -             | 1            |
| 400         | ASP         | -             | -             | 1             | -             | -             | 1            |
| 441         | GLY         | -             | -             | -             | -             | 1             | 1            |
| 442         | PRO         | -             | -             | -             | -             | 1             | 1            |
| 446         | LYS         | -             | -             | 1             | -             | -             | 1            |
| 526         | ASN         | -             | -             | 1             | -             | -             | 1            |
| 538         | ASN         | -             | -             | 1             | -             | -             | 1            |
| 541         | ARG         | -             | -             | 1             | -             | -             | 1            |
| 543         | TYR         | -             | -             | 1             | -             | -             | 1            |
| 545         | GLY         | -             | -             | 1             | -             | -             | 1            |
| 546         | SER         | -             | -             | 1             | -             | -             | 1            |
| 568         | ASP         | -             | -             | 1             | -             | -             | 1            |
| 580         | MET         | -             | -             | 1             | -             | -             | 1            |
| 582         | ASN         | -             | -             | -             | -             | 1             | 1            |
| 583         | THR         | -             | -             | -             | 4             | 1             | 5            |
| 584         | SER         | 1             | 2             | 1             | 3             | 5             | 12           |

|     |              |    |    |    |    |     |    |
|-----|--------------|----|----|----|----|-----|----|
| 585 | VAL          | -  | -  | 1  | -  |     | 1  |
| 586 | LEU          | -  | -  | -  | 5  | 5   | 10 |
| 587 | ASN          | -  | -  | -  | -  | 1   | 1  |
| 588 | SER          | 1  | 1  | 2  | -  | -   | 4  |
| 589 | GLY          | -  | -  | 1  | -  | -   | 1  |
| 596 | SER          | -  | 1  | -  | 1  | -   | 2  |
| 606 | GLN          | -  | -  | 1  | -  | -   | 1  |
| 607 | ALA          | 1  | -  | 1  | 1  | -   | 3  |
| 611 | SER          | -  | -  | 1  | -  | -   | 1  |
| 612 | ALA          | 4  | 1  | 6  | 4  | 10  | 25 |
|     | <b>total</b> | 38 | 36 | 78 | 22 | 311 |    |

**SI Table 6 | Pore-facing residues during 201phi2-1 chimallin simulations**

| Center 4-fold |      |       | Corner 4-fold |      |       |
|---------------|------|-------|---------------|------|-------|
| resi          | resn | count | resi          | resn | count |
| 69            | GLU  | 2     | 117           | ASN  | 3     |
| 72            | THR  | 6     | 119           | GLN  | 2     |
| 76            | ARG  | 9     | 303           | PRO  | 1     |
| 79            | GLU  | 9     | 304           | GLN  | 1     |
| 80            | GLN  | 6     | 305           | ALA  | 1     |
| 83            | ALA  | 5     | 307           | ALA  | 1     |
| 131           | ASN  | 1     | 309           | THR  | 1     |
| 133           | SER  | 1     | 311           | PHE  | 1     |
| 196           | ASP  | 2     | 312           | PRO  | 1     |
| 198           | VAL  | 9     | 317           | VAL  | 1     |
| 200           | LYS  | 9     | 319           | THR  | 1     |
| 201           | ASP  | 8     | 320           | PRO  | 2     |
| 203           | ARG  | 1     | 414           | PRO  | 1     |
| 203           | GLU  | 3     | 415           | ASN  | 1     |
| 372           | VAL  | 4     | 445           | GLN  | 1     |
| 373           | ALA  | 1     | 452           | ILE  | 1     |
| 374           | LYS  | 8     | 453           | ARG  | 2     |
| 375           | ASP  | 2     | 456           | ASN  | 1     |
| 377           | LYS  | 1     | 464           | GLU  | 4     |
| 378           | ASP  | 1     | 465           | ARG  | 2     |
| 391           | ARG  | 5     | 466           | PHE  | 1     |
| 395           | LYS  | 4     | 468           | ASP  | 3     |
| 480           | GLY  | 1     | 469           | HIS  | 1     |
| 488           | PHE  | 9     | 470           | THR  | 4     |
| 490           | GLY  | 8     | 471           | THR  | 4     |
| 491           | ASP  | 4     | 472           | GLN  | 2     |
| 493           | LYS  | 6     | 562           | LYS  | 2     |
| 509           | ASP  | 1     | 569           | ARG  | 1     |
| 509           | GLU  | 8     | 573           | GLU  | 1     |
| 511           | ASN  | 1     | 596           | SER  | 1     |
| 546           | SER  | 5     | 600           | ASN  | 3     |
| 547           | THR  | 5     | 601           | ASN  | 1     |
|               |      |       | 602           | MET  | 1     |
|               |      |       | 604           | SER  | 2     |
|               |      |       | 606           | GLN  | 1     |
|               |      |       | 607           | ALA  | 1     |

## SI Table 7 | Bacteriophage chimallin proteins

| Genbank ID              | Protein ID   | Scientific Name                                           |
|-------------------------|--------------|-----------------------------------------------------------|
| QDB70465.1              | gp052        | <i>Aeromonas</i> phage CF8                                |
| QDJ97041.1              | gp044        | <i>Aeromonas</i> phage D3                                 |
| QDH47031.1              | gp211        | <i>Aeromonas</i> phage LAh10                              |
| QDJ96807.1              | gp048        | <i>Aeromonas</i> phage PS1                                |
| BCM95275.1              | gp239        | <i>Burkholderia</i> phage FLC6                            |
| YP_008125763.1          | gp023        | <i>Cronobacter</i> phage CR5                              |
| YP_009821902.1          | gp002        | <i>Edwardsiella</i> phage pEt-SU                          |
| YP_009005014.1          | gp219        | <i>Erwinia</i> phage Ea35-70                              |
| QQO90522.1              | gp038        | <i>Erwinia</i> phage pEa_SNUABM_43                        |
| YP_009010075.1          | gp022        | <i>Erwinia</i> phage PhiEaH1                              |
| YP_007237854.1          | gp204        | <i>Erwinia</i> phage phiEaH2                              |
| YP_009290657.1          | gp039        | <i>Erwinia</i> phage vB_EamM_Asesino                      |
| YP_009292105.1          | gp248        | <i>Erwinia</i> phage vB_EamM_Caitlin                      |
| YP_009292727.1          | gp253        | <i>Erwinia</i> phage vB_EamM_ChrisDB                      |
| YP_009278336.1          | gp024        | <i>Erwinia</i> phage vB_EamM_EarlPhillipIV                |
| YP_009293007.1          | gp244        | <i>Erwinia</i> phage vB_EamM_Huxley                       |
| YP_009278639.1          | gp265        | <i>Erwinia</i> phage vB_EamM_Kwan                         |
| YP_009283513.1          | gp024        | <i>Erwinia</i> phage vB_EamM_Phobos                       |
| ANH52002.1              | gp222        | <i>Erwinia</i> phage vB_EamM_RAY                          |
| YP_009612772.1          | gp028        | <i>Erwinia</i> phage vB_EamM_RisingSun                    |
| YP_009606010.1          | gp299        | <i>Erwinia</i> phage vB_EamM_Simmy50                      |
| QKN85862.1              | gp240        | <i>Escherichia</i> phage vB_EcoM_EC001                    |
| <b>* YP_009820873.1</b> | <b>gp189</b> | <b><i>Escherichia</i> phage vB_EcoM_Goslar</b>            |
| YP_006383413.1          | gp133        | <i>Halocynthia</i> phage JM-2012 (infects <i>Vibrio</i> ) |
| QPB09376.1              | gp281        | <i>Klebsiella</i> phage Miami                             |
| QGH71899.1              | gp036        | <i>Klebsiella</i> phage N1M2                              |
| QQV92022.1              | gp083        | <i>Klebsiella</i> phage vB_KpM_FBKp24                     |

|                         |               |                                           |
|-------------------------|---------------|-------------------------------------------|
| CAD5236077.1            | gp088         | <i>Klebsiella</i> phage vB_KvM-Eowyn      |
| YP_009853356.1          | gp004         | <i>Photobacterium</i> phage PDCC-1        |
| QMP24145.1              |               | <i>Proteus</i> phage 10                   |
| QNN97444.1              |               | <i>Proteus</i> phage 7                    |
| <b>* YP_001956829.1</b> | <b>gp105</b>  | <b><i>Pseudomonas</i> phage 201phi2-1</b> |
| * YP_418056.1           | gp023         | <i>Pseudomonas</i> phage EL               |
| ANM44831.1              | gp073         | <i>Pseudomonas</i> phage KTN4             |
| YP_009608965.1          | gp050         | <i>Pseudomonas</i> phage Noxifer          |
| YP_004957964.1          | gp057         | <i>Pseudomonas</i> phage OBP              |
| BBI55859.1              | gp186         | <i>Pseudomonas</i> phage PA02             |
| QBX32206.1              |               | <i>Pseudomonas</i> phage PA1C             |
| YP_009617618.1          | gp330         | <i>Pseudomonas</i> phage PA7              |
| ARV76713.1              | gp082         | <i>Pseudomonas</i> phage Phabio           |
| * YP_009217136.1        | gp054         | <i>Pseudomonas</i> phage phiPA3           |
| QBJ02586.1              | gp056         | <i>Pseudomonas</i> phage Psa21            |
| YP_009619844.1          | gp304         | <i>Pseudomonas</i> phage SL2              |
| QOV07924.1              |               | <i>Pseudomonas</i> phage vB_PaeM_kmuB     |
| QEM41783.1              |               | <i>Pseudomonas</i> phage vB_PaeM_PS119XW  |
| * NP_803620.1           | gp054         | <i>Pseudomonas</i> virus phiKZ            |
| YP_009598981.1          | gp133         | <i>Ralstonia</i> phage RP12               |
| * BAW19549.1            | gp286         | <i>Ralstonia</i> phage RP31               |
| YP_009208033.2          | gp229         | <i>Ralstonia</i> phage RSF1               |
| * YP_009213072.1        | gp223         | <i>Ralstonia</i> phage RSL2               |
| QNI20738.1              |               | <i>Salmonella</i> phage JN03              |
| QOC54489.1              | gp029         | <i>Salmonella</i> phage pSal-SNUABM-04    |
| * YP_009153316.1        | gp244         | <i>Salmonella</i> phage SPN3US            |
| AWN08967.1              | gp006         | <i>Salmonella</i> phage STsAS             |
| QKE54546.1              | gp230         | <i>Salmonella</i> phage vB_SalM_SA002     |
| YP_009833990.1          | gp310/311/312 | <i>Serratia</i> phage 2050HW              |
| YP_009849136.1          | gp040         | <i>Serratia</i> phage Moabite             |

|                  |       |                                       |
|------------------|-------|---------------------------------------|
| * QFP93061.1     |       | <i>Serratia</i> phage PCH45           |
| YP_009843316.1   | gp214 | <i>Vibrio</i> phage 2 TSL-2019        |
| * YP_009622192.1 | gp065 | <i>Vibrio</i> phage Aphrodite1        |
| * AXH70812.1     | gp071 | <i>Vibrio</i> phage BONAISHI          |
| YP_009599417.1   | gp130 | <i>Vibrio</i> phage pTD1              |
| AQT28149.1       | gp208 | <i>Vibrio</i> phage pVa-21            |
| YP_009847864.1   | gp128 | <i>Vibrio</i> phage USC-1             |
| QNI21050.1       |       | <i>Vibrio</i> phage vB_pir03          |
| QAX96061.1       |       | <i>Vibrio</i> phage vB_VmeM-Yong XC31 |
| YP_009626053.1   | gp077 | <i>Vibrio</i> phage VP4B              |
| QNR51901.1       | gp210 | <i>Xanthomonas</i> phage Xoo-sp14     |

**SI Table 8 | Summary of *in vitro* Goslar chimallin protomer interfaces**

| Chain-1 | Atoms | Residues | Chain-2 | Atoms | Residues | Area (Å <sup>2</sup> ) | H bonds | Salt<br>bridge | Cation- $\pi$ |
|---------|-------|----------|---------|-------|----------|------------------------|---------|----------------|---------------|
| A       | 11    | 3        | F       | 11    | 3        | 91                     | 0       | 2              | 0             |
| A       | 164   | 38       | H       | 210   | 62       | 1779                   | 18      | 11             | 1             |
| A       | 210   | 62       | B       | 164   | 38       | 1779                   | 18      | 11             | 1             |
| A       | 206   | 54       | D       | 210   | 58       | 2024                   | 16      | 6              | 3             |
| A       | 210   | 58       | G       | 206   | 56       | 2024                   | 16      | 6              | 3             |



**SI Table 9 | Summary of a Goslar chimallin protomer's polar interactions *in vitro***

| Chain-1 | Resi | Resn | Atom | Chain-2 | Resi | Resn | Atom | Dist (Å) | Type |     |             |
|---------|------|------|------|---------|------|------|------|----------|------|-----|-------------|
| A       | F    | 140  | HIS  | NE2     | F    | A    | 427  | ASP      | OD2  | 3.2 | Salt bridge |
| A       | B    | 46   | MET  | O       | H    | A    | 279  | GLN      | NE2  | 3.5 | H bond      |
| A       | B    | 50   | ASN  | ND2     | H    | A    | 330  | GLU      | O    | 3.4 | H bond      |
| A       | B    | 50   | ASN  | OD1     | H    | A    | 332  | ASP      | N    | 3.5 | H bond      |
| A       | B    | 55   | ARG  | NE      | H    | A    | 206  | ASN      | OD1  | 3.1 | H bond      |
| A       | B    | 55   | ARG  | NH2     | H    | A    | 210  | THR      | OG1  | 3.2 | H bond      |
| A       | B    | 56   | ARG  | NH1     | H    | A    | 107  | SER      | OG   | 3.7 | H bond      |
| A       | B    | 56   | ARG  | NH2     | H    | A    | 209  | GLN      | OE1  | 3.4 | H bond      |
| A       | B    | 56   | ARG  | NH2     | H    | A    | 107  | SER      | OG   | 3.6 | H bond      |
| A       | B    | 57   | ILE  | N       | H    | A    | 205  | ASP      | OD2  | 3.1 | H bond      |
| A       | B    | 57   | ILE  | O       | H    | A    | 202  | SER      | OG   | 3.6 | H bond      |
| A       | B    | 59   | ARG  | NH1     | H    | A    | 332  | ASP      | O    | 3.7 | H bond      |
| A       | B    | 59   | ARG  | NH2     | H    | A    | 331  | LEU      | O    | 3.1 | H bond      |
| A       | B    | 60   | ASN  | ND1     | H    | A    | 329  | LEU      | O    | 3.3 | H bond      |
| A       | B    | 97   | SER  | O       | H    | A    | 275  | TYR      | OH   | 3.2 | H bond      |
| A       | B    | 130  | PRO  | O       | H    | A    | 278  | GLN      | NE2  | 2.7 | H bond      |
| A       | B    | 152  | ASN  | ND2     | H    | A    | 276  | ASP      | O    | 3.3 | H bond      |
| A       | B    | 152  | ASN  | OD1     | H    | A    | 276  | ASP      | N    | 3.3 | H bond      |
| A       | B    | 154  | ASN  | ND2     | H    | A    | 273  | SER      | O    | 3.3 | H bond      |
| A       | B    | 55   | ARG  | NH1     | H    | A    | 213  | GLU      | OE1  | 3.8 | Salt bridge |
| A       | B    | 55   | ARG  | NH1     | H    | A    | 213  | GLU      | OE2  | 3.1 | Salt bridge |
| A       | B    | 55   | ARG  | NH2     | H    | A    | 213  | GLU      | OE1  | 3.4 | Salt bridge |
| A       | B    | 56   | ARG  | NE      | H    | A    | 205  | ASP      | OD1  | 3.1 | Salt bridge |
| A       | B    | 56   | ARG  | NH1     | H    | A    | 85   | ASP      | OD2  | 3.3 | Salt bridge |
| A       | B    | 56   | ARG  | NH2     | H    | A    | 205  | ASP      | OD1  | 3.1 | Salt bridge |
| A       | B    | 134  | ARG  | NE      | H    | A    | 276  | ASP      | OD2  | 3.9 | Salt bridge |
| A       | B    | 134  | ARG  | NH2     | H    | A    | 274  | ASP      | OD1  | 3.5 | Salt bridge |

|   |   |     |     |     |   |   |     |     |     |     |               |
|---|---|-----|-----|-----|---|---|-----|-----|-----|-----|---------------|
| A | B | 134 | ARG | NH2 | H | A | 274 | ASP | OD2 | 3.2 | Salt bridge   |
| A | B | 134 | ARG | NH2 | H | A | 276 | ASP | OD2 | 3.6 | Salt bridge   |
| A | B | 147 | ARG | NH1 | H | A | 276 | ASP | OD2 | 3.6 | Salt bridge   |
| A | B | 56  | ARG | CZ  | H | A | 86  | PHE | -   | 5.6 | Cation- $\pi$ |
| A | G | 399 | TYR | OH  | D | A | 300 | ASN | N   | 3.5 | H bond        |
| A | G | 403 | GLN | NE2 | D | A | 297 | PRO | O   | 3.4 | H bond        |
| A | G | 427 | ARG | NH2 | D | A | 628 | PHE | O   | 2.5 | H bond        |
| A | G | 593 | ARG | NH2 | D | A | 517 | GLU | O   | 4.7 | H bond        |
| A | G | 595 | ASN | N   | D | A | 292 | TYR | O   | 2.9 | H bond        |
| A | G | 595 | ASN | O   | D | A | 293 | SER | OG  | 2.9 | H bond        |
| A | G | 599 | ARG | NE  | D | A | 293 | SER | OG  | 3.6 | H bond        |
| A | G | 599 | ARG | NH2 | D | A | 294 | PRO | O   | 3.3 | H bond        |
| A | G | 599 | ARG | NH2 | D | A | 293 | SER | OG  | 3.7 | H bond        |
| A | G | 603 | LEU | N   | D | A | 410 | LEU | O   | 2.7 | H bond        |
| A | G | 603 | LEU | O   | D | A | 410 | LEU | N   | 3.6 | H bond        |
| A | G | 604 | GLY | O   | D | A | 351 | ASN | ND2 | 3.5 | H bond        |
| A | G | 605 | ASN | O   | D | A | 566 | GLN | NE2 | 2.8 | H bond        |
| A | G | 610 | ILE | O   | D | A | 579 | ILE | N   | 2.9 | H bond        |
| A | G | 611 | TYR | OH  | D | A | 348 | ALA | O   | 3.2 | H bond        |
| A | G | 612 | ALA | N   | D | A | 579 | ILE | O   | 3.4 | H bond        |
| A | G | 593 | ARG | NE  | D | A | 521 | ASP | OD1 | 3.0 | Salt bridge   |
| A | G | 593 | ARG | NH1 | D | A | 520 | GLU | OE1 | 3.5 | Salt bridge   |
| A | G | 593 | ARG | NH2 | D | A | 521 | ASP | OD1 | 3.6 | Salt bridge   |
| A | G | 593 | ARG | NH2 | D | A | 520 | GLU | OE1 | 2.6 | Salt bridge   |
| A | G | 601 | ARG | NH1 | D | A | 559 | ASP | OD1 | 3.4 | Salt bridge   |
| A | G | 601 | ARG | NH1 | D | A | 559 | ASP | OD2 | 3.1 | Salt bridge   |
| A | G | 427 | ARG | CZ  | D | A | 631 | PHE | -   | 4.3 | Cation- $\pi$ |
| A | G | 593 | ARG | CZ  | D | A | 292 | TYR | -   | 5.2 | Cation- $\pi$ |
| A | G | 599 | ARG | CZ  | D | A | 407 | TYR | -   | 5.8 | Cation- $\pi$ |



**SI Table 10 | Bacterial strains and plasmids used in this study**

| Bacterial strain                       | Source                 |
|----------------------------------------|------------------------|
| <i>Pseudomonas chlororaphis</i> 200-B  | 88                     |
| <i>Escherichia coli</i> APEC 2248      | DSMZ (dsmz.de) #103255 |
| <i>Escherichia coli</i> Rosetta2 pLysS | EMD Millipore          |

| Plasmid                                         | Host strain                   | Source                       |
|-------------------------------------------------|-------------------------------|------------------------------|
| pHERD30-T                                       | <i>P. chlororaphis</i>        | 89                           |
| pHERD30-T + GFPmut1                             | <i>P. chlororaphis</i>        | 90                           |
| pHERD30-T + 201phi2-1 GFP-chimallin full-length | <i>P. chlororaphis</i>        | this study                   |
| pHERD30-T + 201phi2-1 GFP-chimallin 48-631      | <i>P. chlororaphis</i>        | this study                   |
| pHERD30-T + 201phi2-1 GFP-chimallin 64-631      | <i>P. chlororaphis</i>        | this study                   |
| pHERD30-T + 201phi2-1 GFP-chimallin 1-611       | <i>P. chlororaphis</i>        | this study                   |
| pHERD30-T + 201phi2-1 GFP-chimallin 1-581       | <i>P. chlororaphis</i>        | this study                   |
| pHERD30-T + 201phi2-1 GFP-chimallin 48-611      | <i>P. chlororaphis</i>        | this study                   |
| pHERD30-T + 201phi2-1 GFP-chimallin 64-581      | <i>P. chlororaphis</i>        | this study                   |
| 2-BT (His6-TEV site fusion expression vector)   | <i>E. coli</i> Rosetta2 pLysS | Addgene (addgene.org) #29666 |
| 2-BT + 201phi2-1 chimallin FL                   | <i>E. coli</i> Rosetta2 pLysS | this study                   |
| 2-BT + 201phi2-1 chimallin 48-631               | <i>E. coli</i> Rosetta2 pLysS | this study                   |

|                                     |                               |            |
|-------------------------------------|-------------------------------|------------|
| 2-BT + 201phi2-1 chimallin 64-631   | <i>E. coli</i> Rosetta2 pLysS | this study |
| 2-BT + 201phi2-1 chimallin 1-612    | <i>E. coli</i> Rosetta2 pLysS | this study |
| 2-BT + 201phi2-1 chimallin 1-582    | <i>E. coli</i> Rosetta2 pLysS | this study |
| 2-BT + 201phi2-1 chimallin 48-612   | <i>E. coli</i> Rosetta2 pLysS | this study |
| 2-BT + 201phi2-1 chimallin 64-582   | <i>E. coli</i> Rosetta2 pLysS | this study |
| 2-BT + Goslar chimallin full-length | <i>E. coli</i> Rosetta2 pLysS | this study |
